# Supplementary material for: 5ʹ-Ectonucleotidase CD73/NT5E supports EGFR-mediated invasion of HPV-negative head and neck carcinoma cells
Source: PubMed Central journal article supplement (PMC10463398; doi:10.1186/s12929-023-00968-6), 2023-08-24

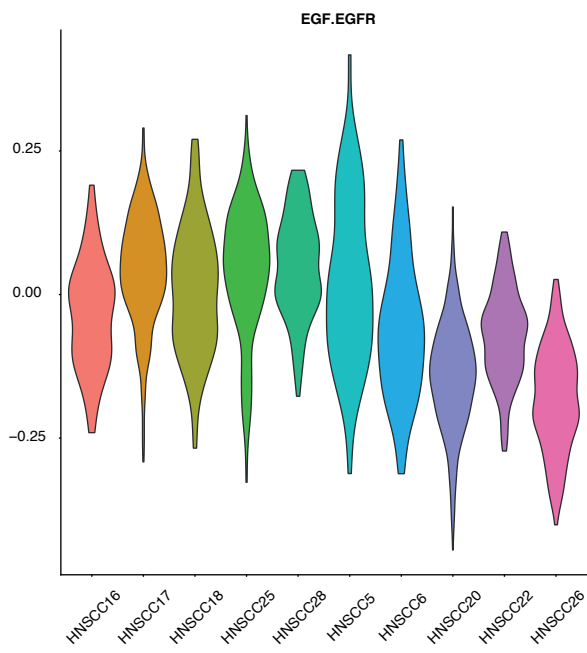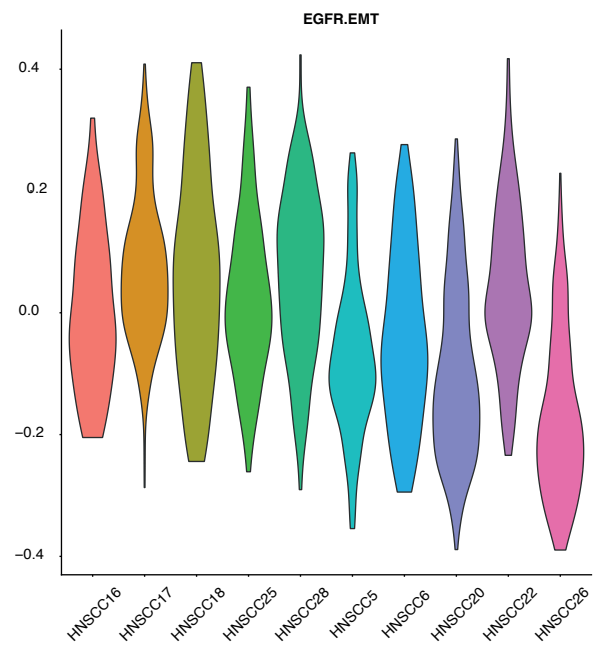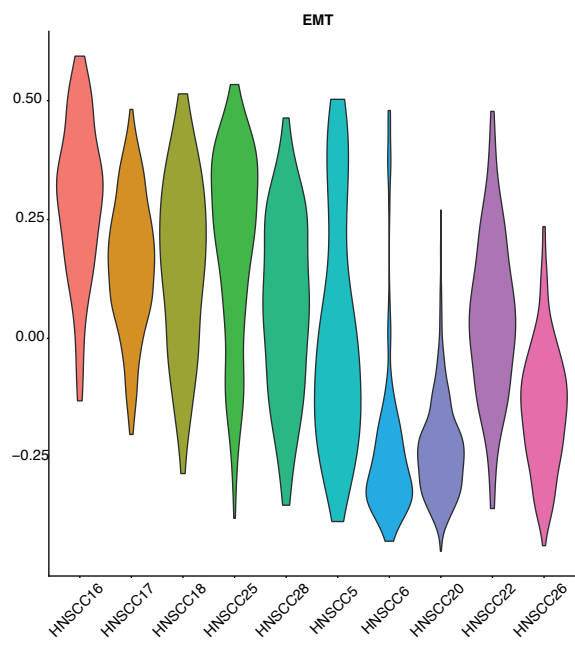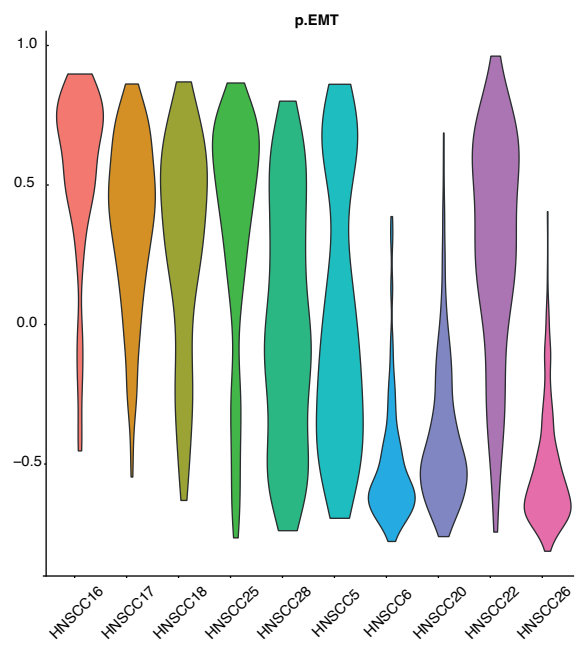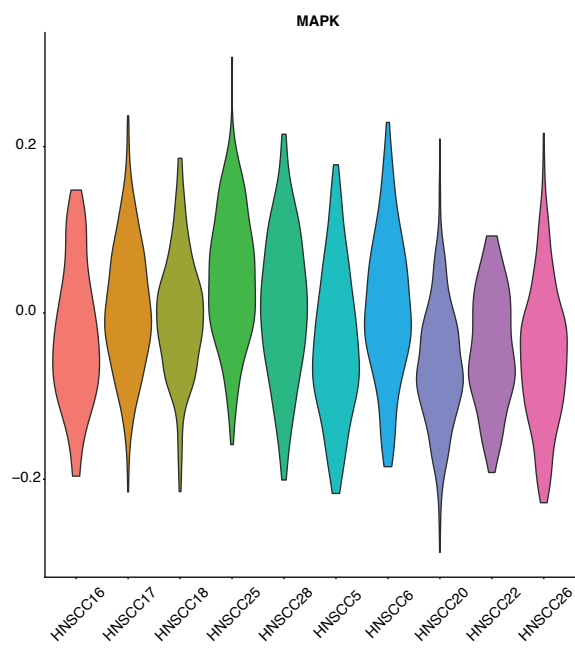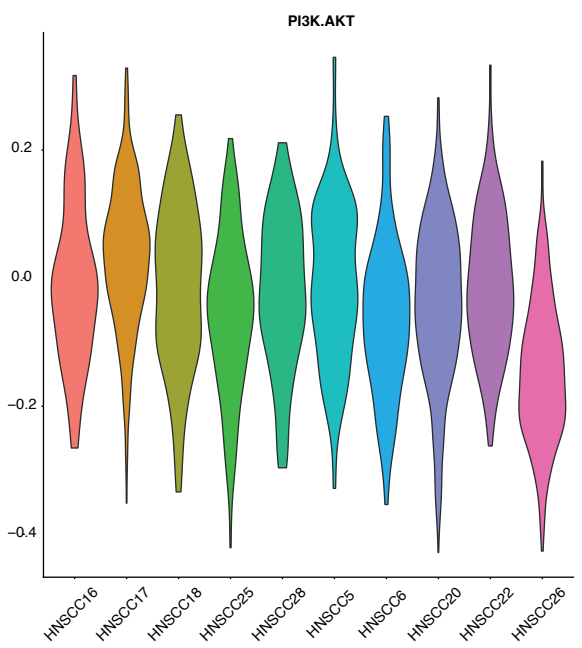

Supplement: 12929_2023_968_MOESM2_ESM.pdf [file 12929_2023_968_MOESM2_ESM.pdf]
